# Supplementary material
Source: PubMed Central journal article supplement (PMC2791178)

# Supporting Information

## Chemoenzymatic synthesis and lectin array characterization of a class of N-glycan clusters

Wei Huang<sup>1</sup>, Denong Wang<sup>2</sup>, Masao Yamada<sup>3</sup> and Lai-Xi Wang<sup>1\*</sup>

<sup>1</sup>Institute of Human Virology and Department of Biochemistry & Molecular Biology, University of Maryland School of Medicine, Baltimore, Maryland 21201, USA

<sup>2</sup>Stanford Tumor Glycome Laboratory, Department of Genetics, Stanford University School of Medicine, Stanford, CA 94305, USA

<sup>3</sup>GP Biosciences Ltd, 1-3-3 Azamino-minami, Aoba-ku, Yokohama 225-0012, JAPAN

**Complete Ref. 4a:**

Blixt, O.; Head, S.; Mondala, T.; Scanlan, C.; Huflejt, M. E.; Alvarez, R.; Bryan, M. C.; Fazio, F.; Calarese, D.; Stevens, J.; Razi, N.; Stevens, D. J.; Skehel, J. J.; van Die, I.; Burton, D. R.; Wilson, I. A.; Cummings, R.; Bovin, N.; Wong, C. H.; Paulson, J. C. *Proc. Natl. Acad. Sci. USA* **2004**, *101*, 17033-17038.

**Figure S1:** Assignment of the two mono-glycosylated products (**10a** and **10b**) by specific enzymatic transformation coupled with MS analysis.

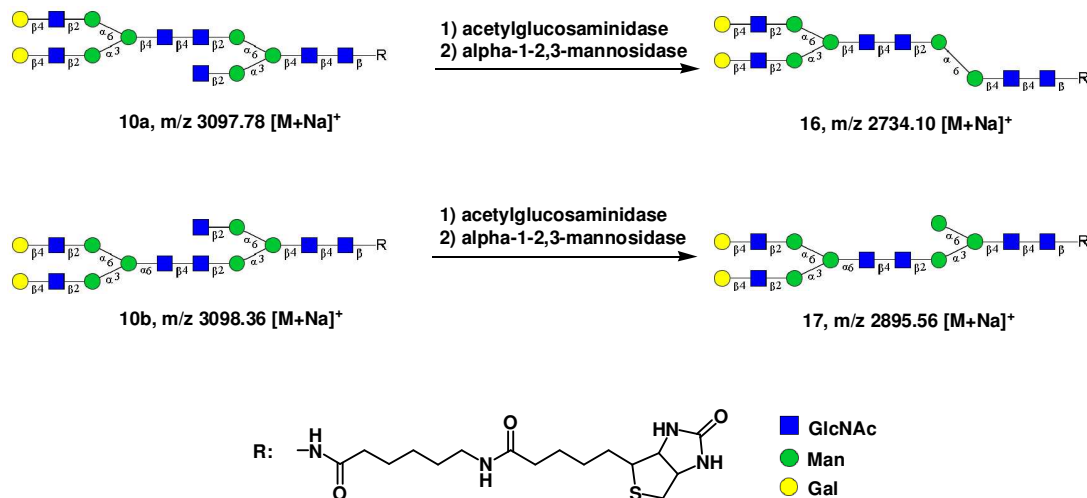

The attachment of the new glycan at the 6-arm (in **10a**) or at the 3-arm (in **10b**) of the GlcNAc<sub>2</sub>Man<sub>3</sub>GlcNAc<sub>2</sub>-core was confirmed by the following enzymatic transformations coupled with MS analysis. Briefly, compound **10a** or **10b** (20 μg) and BSA (3 μg) was dissolved in a sodium citrate buffer (50 mM, pH 6.0, 30 μL) and the solution was incubated with β-N-acetylglucosaminidase (6 U) from *Xanthomonas manihotis* at 37°C for 2h. The reaction was monitored by MALDI-TOF MS until complete removal of the terminal GlcNAc residue at the non-reducing end. Then the reaction medium was adjusted to pH 5.5 and was incubated with an α-1,2/α-1,3-mannosidase (50 U) from *Xanthomonas manihotis* at 37°C overnight. This enzymatic treatment of **10a** gave product **16**: Analytical HPLC: t<sub>R</sub> = 10.9 min; MALDI-TOF-MS: found, 2734.10 [M + Na]<sup>+</sup>, calculated for C<sub>106</sub>H<sub>176</sub>N<sub>10</sub>O<sub>68</sub>S, M = 2710.62 Da. These results indicated that the GlcNAc residue at the α-1,3-Man arm in the core should be un-substituted,

resulting in sequential removal of the GlcNAc by the  $\beta$ -N-acetylglucosaminidase and then the exposed  $\alpha$ -1,3-linked Man residue by the  $\alpha$ -1,2/ $\alpha$ -1,3-mannosidase to give **16**. On the other hand, the same treatment on compound **10b** gave product **17**: Analytical HPLC:  $t_R = 11.1$  min; MALDI-TOF-MS: calculated for  $C_{112}H_{186}N_{10}O_{73}S$ ,  $M = 2872.76$  Da, found, 2895.56  $[M + Na]^+$ . The MS analysis indicated that only a GlcNAc residue was removed from 10b by sequential enzymatic treatment, confirming that the  $\alpha$ -1,3-arm was blocked by the attachment of newly introduced glycan. The  $\alpha$ -1,6-Man residue exposed would not be hydrolyzed by the  $\alpha$ -1,2/ $\alpha$ -1,3-mannosidase.

**Figure S2.** Characterization of mono-glycosylated product **12a** generated from the reaction of Man9GlcNAc-oxazoline (**11**) and acceptor **7**.

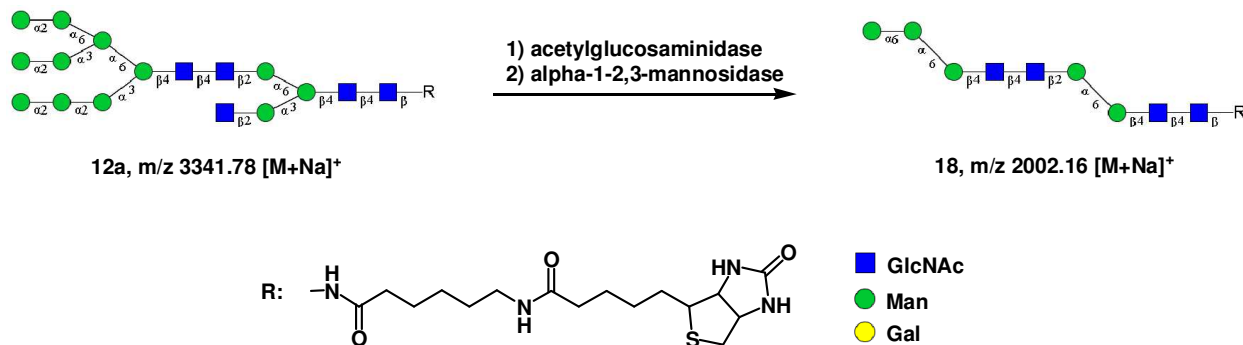

The sequential treatment of **12a** by the  $\beta$ -N-acetylglucosaminidase and the  $\alpha$ -1,2/ $\alpha$ -1,3-mannosidase was performed in the same way as the characterization of 10a and 10b. The enzymatic transformation gave compound **18**: Analytical HPLC:  $t_R = 10.8$  min; MALDI-TOF-MS: calculated for  $C_{78}H_{130}N_8O_{48}S$ ,  $M = 1978.77$  Da, found,  $2002.16 [M + Na]^+$ . The MS data of **18** indicated the removal of a GlcNAc and a Man residue from **12a**. These results confirm that the  $\alpha$ -1,3-arm was open and the  $\alpha$ -1,6-arm in **12a** was blocked by the newly introduced N-glycan.

**Figure S3. Lectin specificity**

| Lectin No. | Lectin  | Reported specificity                                                     |
|------------|---------|--------------------------------------------------------------------------|
| 1          | LTL     | Fuc 1-3 Gal 1-4)GlcNAc, Fuc 1-2Gal 1-4GlcNAc                             |
| 2          | PSA     | Fuc 1-6GlcNAc, -D-Glc, -D-Man                                            |
| 3          | LCA     | Fuc 1-6GlcNAc, -D-Glc, -D-Man                                            |
| 4          | UEA-I   | Fuc 1-2Gal 1-4GlcNAc                                                     |
| 5          | AOL     | Fuc 1-6GlcNAc (core fucose)                                              |
| 6          | AAL     | Fuc 1-6GlcNAc, Fuc 1-3Gal 1-4)GlcNAc                                     |
| 7          | MAL     | Man 2-3Gal 1-4GlcNAc                                                     |
| 8          | SNA     | Man 2-6Gal/GlcNAc                                                        |
| 9          | SSA     | Man 2-6Gal/GlcNAc                                                        |
| 10         | TJA-I   | Man 2-6Gal/GlcNAc                                                        |
| 11         | PHAL    | tri/tetra-antennary complex-type N-glycan                                |
| 12         | ECA     | Gal 1-4GlcNAc                                                            |
| 13         | RCA120  | Gal 1-4GlcNAc                                                            |
| 14         | PHAE    | biantennary complex-type N-glycan with outer Gal and bisecting GlcNAc    |
| 15         | DSA     | GlcNAc 1-4)n, Gal 1-4GlcNAc                                              |
| 16         | GSL-II  | aglycosylated tri/tetra antennary glycans, GlcNAc                        |
| 17         | NPA     | High-Mannose, Man 1-6Man                                                 |
| 18         | ConA    | High-Mannose, Man 1-6(Man 1-3)Man                                        |
| 19         | GNA     | High-Mannose, Man 1-3Man                                                 |
| 20         | HHL     | High-Mannose, Man 1-3Man, Man 1-6Man                                     |
| 21         | ACG     | Man 2-3Gal 1-4GlcNAc                                                     |
| 22         | TxLCI   | Man 1-3(Man 1-6)Man, bi- and tri-antennary complex-type N-glycan, GlcNAc |
| 23         | BPL     | Gal 1-3GlcNAc, GlcNAc                                                    |
| 24         | TJA-II  | Fuc 1-2Gal 1-> or GlcNAc 1-> groups at their nonreducing terminals       |
| 25         | EEL     | bbod group B antigen, Gal 1-3Gal                                         |
| 26         | ABA     | Gal 1-3GlcNAc                                                            |
| 27         | LEL     | GlcNAc trimers/tetramers, chitin                                         |
| 28         | STL     | GlcNAc oligomers, oligosaccharide containing GlcNAc and MurNAc           |
| 29         | UDA     | b-1,4-linked GlcNAc oligomers                                            |
| 30         | PWM     | GlcNAc 1-4)n                                                             |
| 31         | Jacalin | Gal 1-3GlcNAc, GlcNAc                                                    |
| 32         | PNA     | Gal 1-3GlcNAc                                                            |
| 33         | WFA     | GlcNAc 1-4GlcNAc, Gal 1-3(6)GlcNAc                                       |
| 34         | ACA     | Gal 1-3GlcNAc                                                            |
| 35         | MPA     | Gal 1-3GlcNAc, GlcNAc                                                    |
| 36         | HPA     | a-linked terminal GlcNAc                                                 |
| 37         | VVA     | a-linked terminal GlcNAc, GlcNAc 1-3Gal                                  |
| 38         | DBA     | bbod group A antigen, GlcNAc 1-3GlcNAc                                   |
| 39         | SBA     | a- or -linked terminal GlcNAc, GlcNAc 1-3Gal                             |
| 40         | Casepa  | Mannose, Maltose                                                         |
| 41         | PTL-I   | a-linked terminal GlcNAc                                                 |
| 42         | MAH     | Man 2-3Gal 1-3(Man 2-6)GlcNAc                                            |
| 43         | WGA     | chitin oligomers, Man                                                    |
| 44         | GSL-IA4 | a-linked GlcNAc                                                          |
| 45         | GSL-IB4 | a-linked Gal                                                             |

**$^1\text{H}$  NMR of GlcNAc-LC-Biotin (4)**

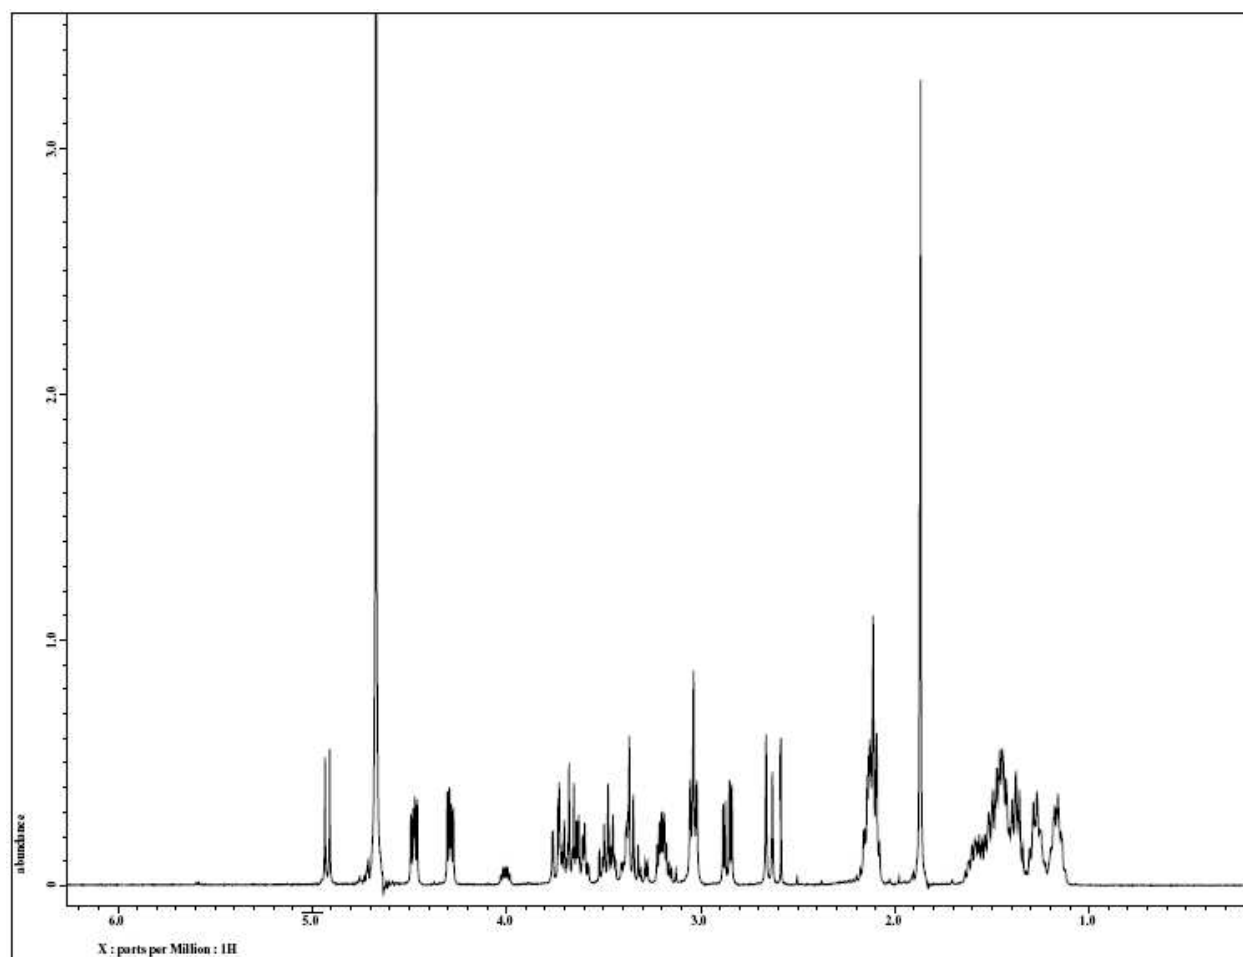

# $^{13}\text{C}$ NMR of GlcNAc-LC-biotin (4)

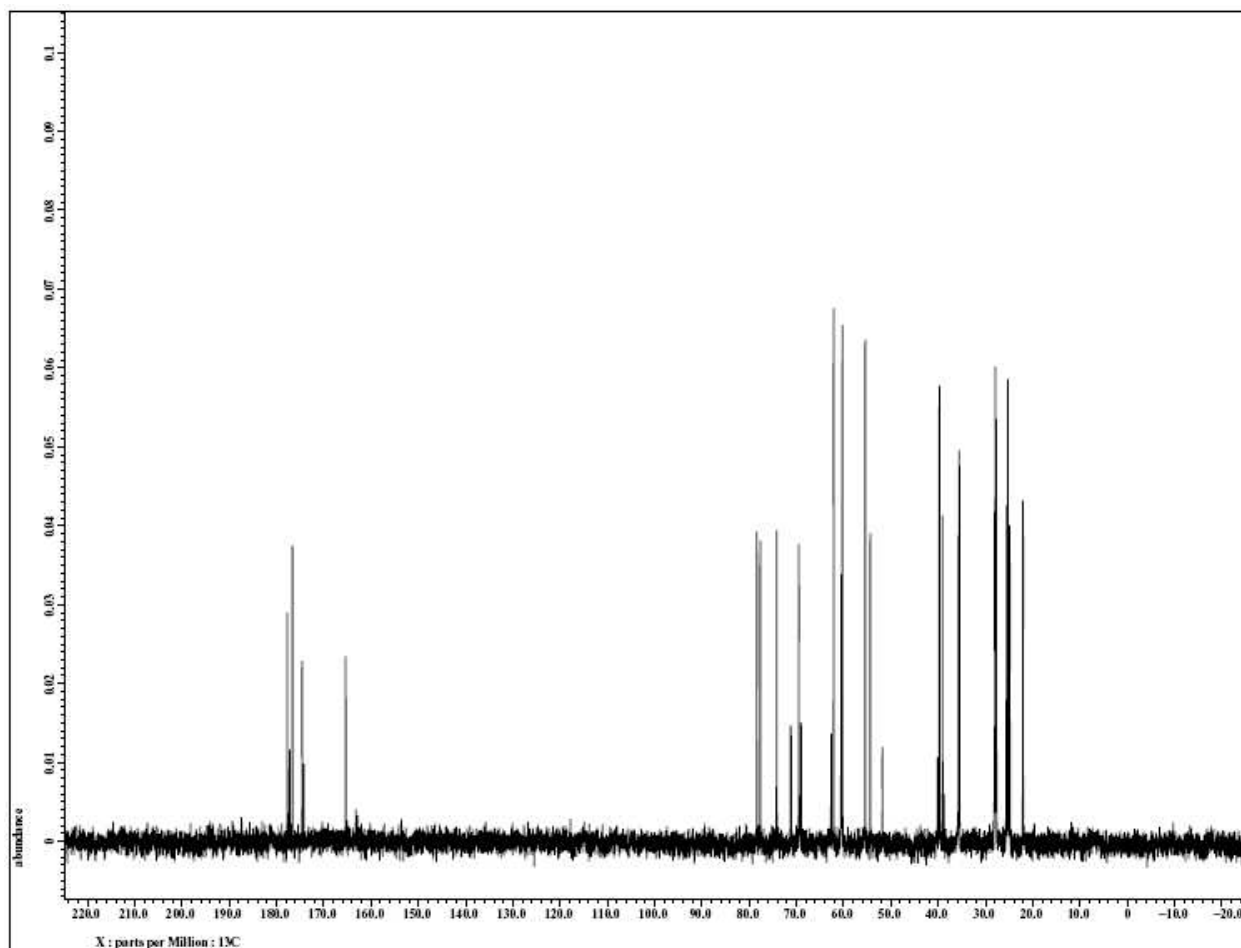



# $^1\text{H}$ - $^1\text{H}$ COSY NMR of GlcNAc-LC-biotin (4)

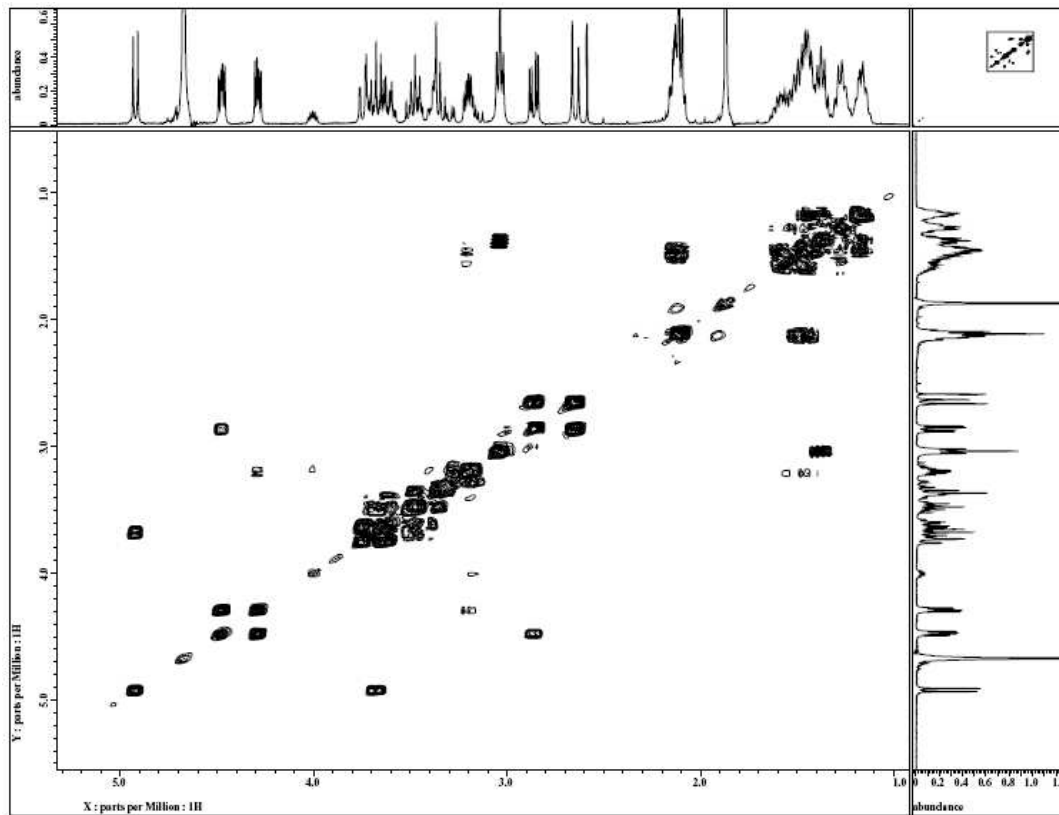

**$^1\text{H}$  NMR of CT-GlcNAc<sub>2</sub>-LC-biotin (6)**

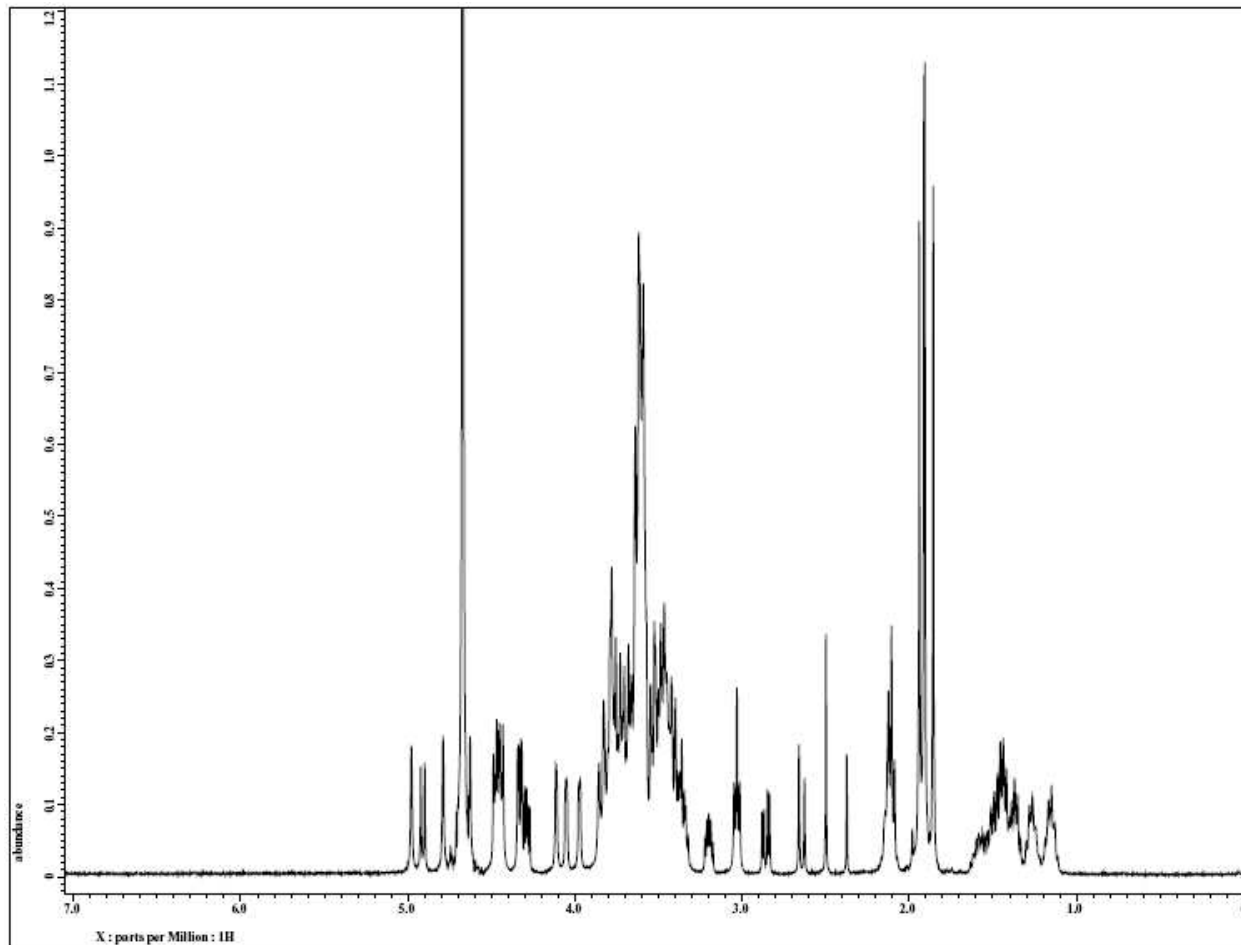

**$^{13}\text{C}$  NMR of CT-GlcNAc<sub>2</sub>-LC-biotin (6)**

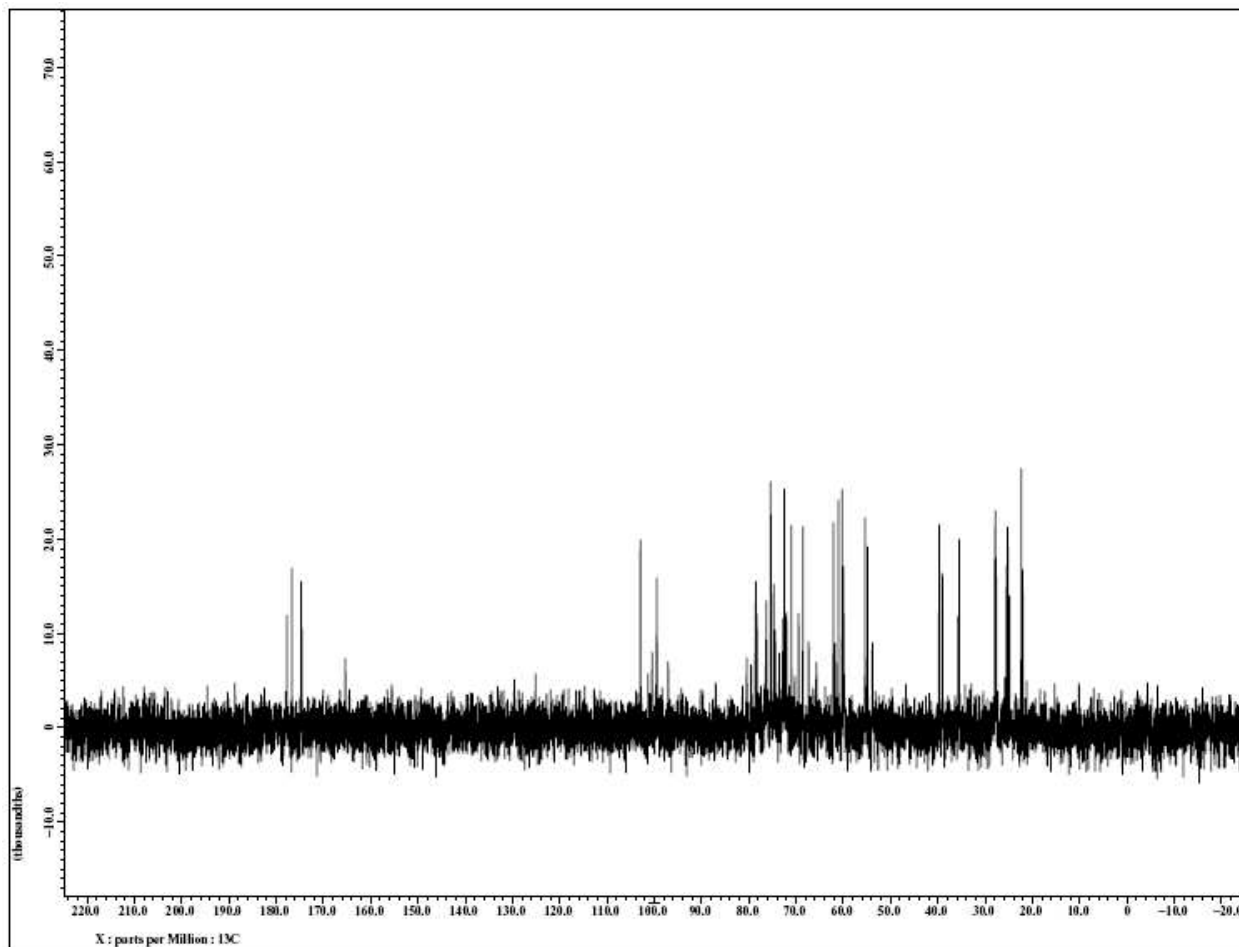

$^1\text{H}$ - $^{13}\text{C}$  HSQC NMR of CT-GlcNAc<sub>2</sub>-LC-biotin (6)

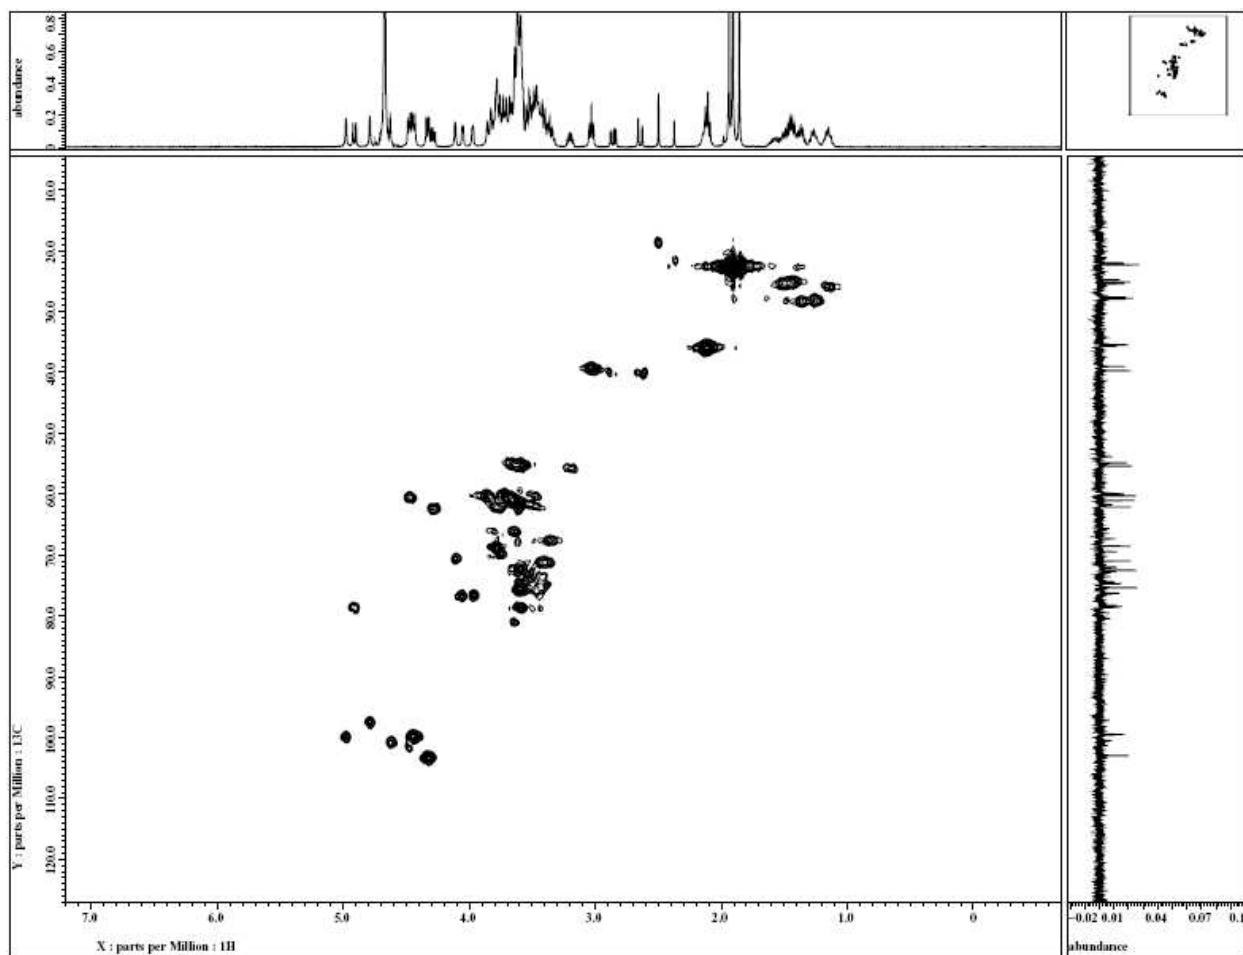

$^1\text{H}$ - $^1\text{H}$  COSY NMR of CT-GlcNAc<sub>2</sub>-LC-biotin (6)

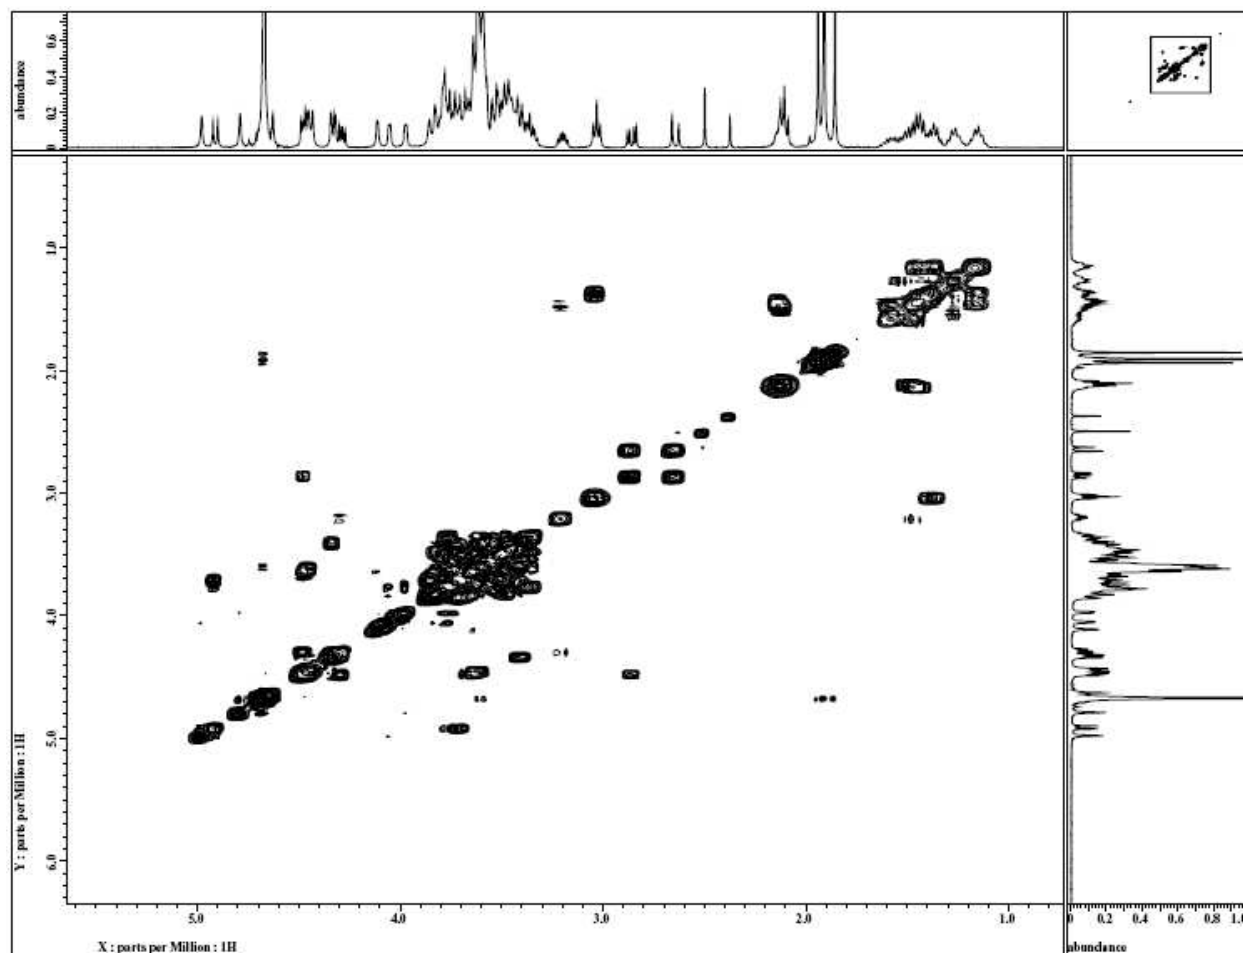

**$^1\text{H}$  NMR of GlcNAc<sub>2</sub>Man<sub>3</sub>GlcNAc<sub>2</sub>-LC-biotin (7)**

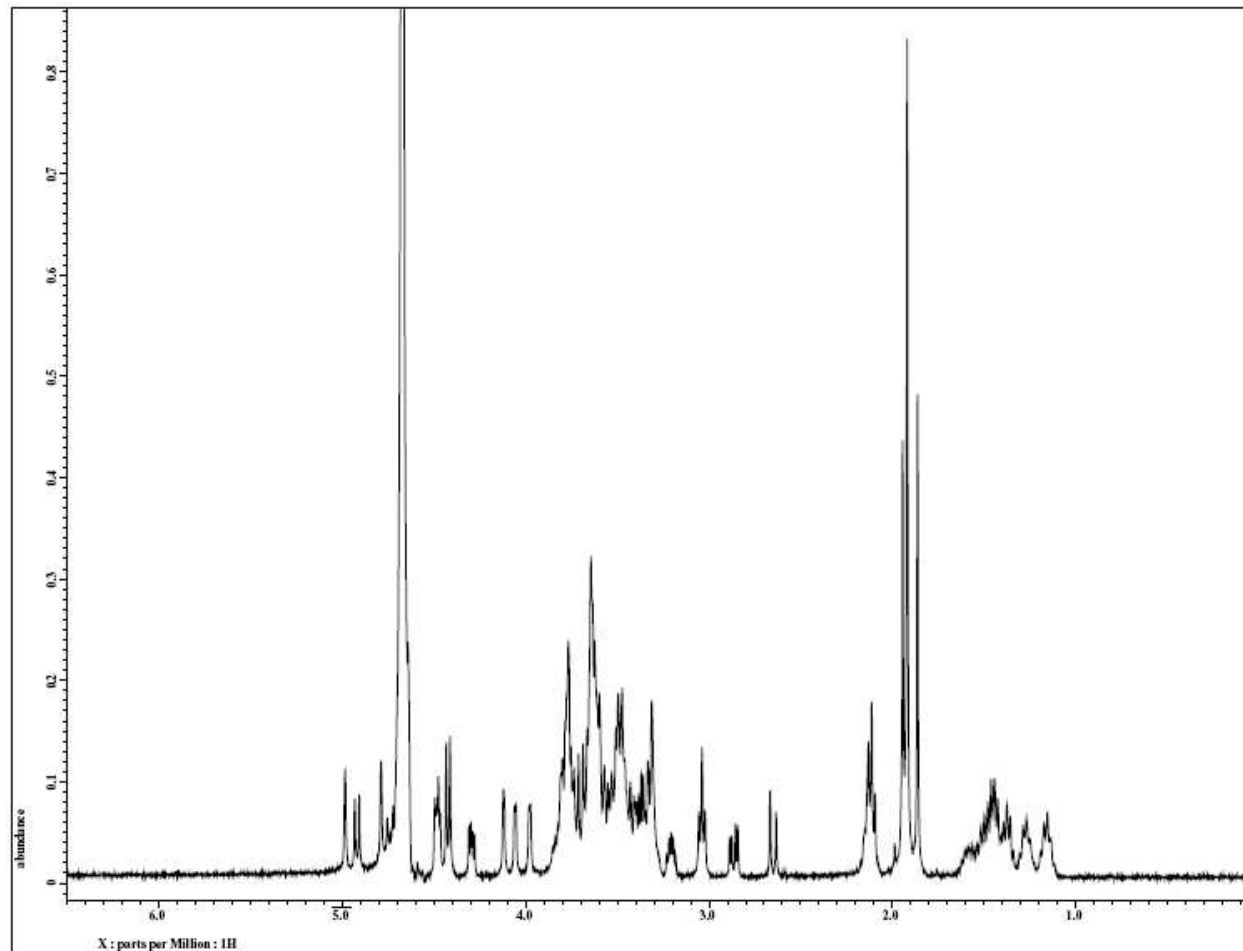

$^{13}\text{C}$  NMR of GlcNAc<sub>2</sub>Man<sub>3</sub>GlcNAc<sub>2</sub>-LC-biotin (7)

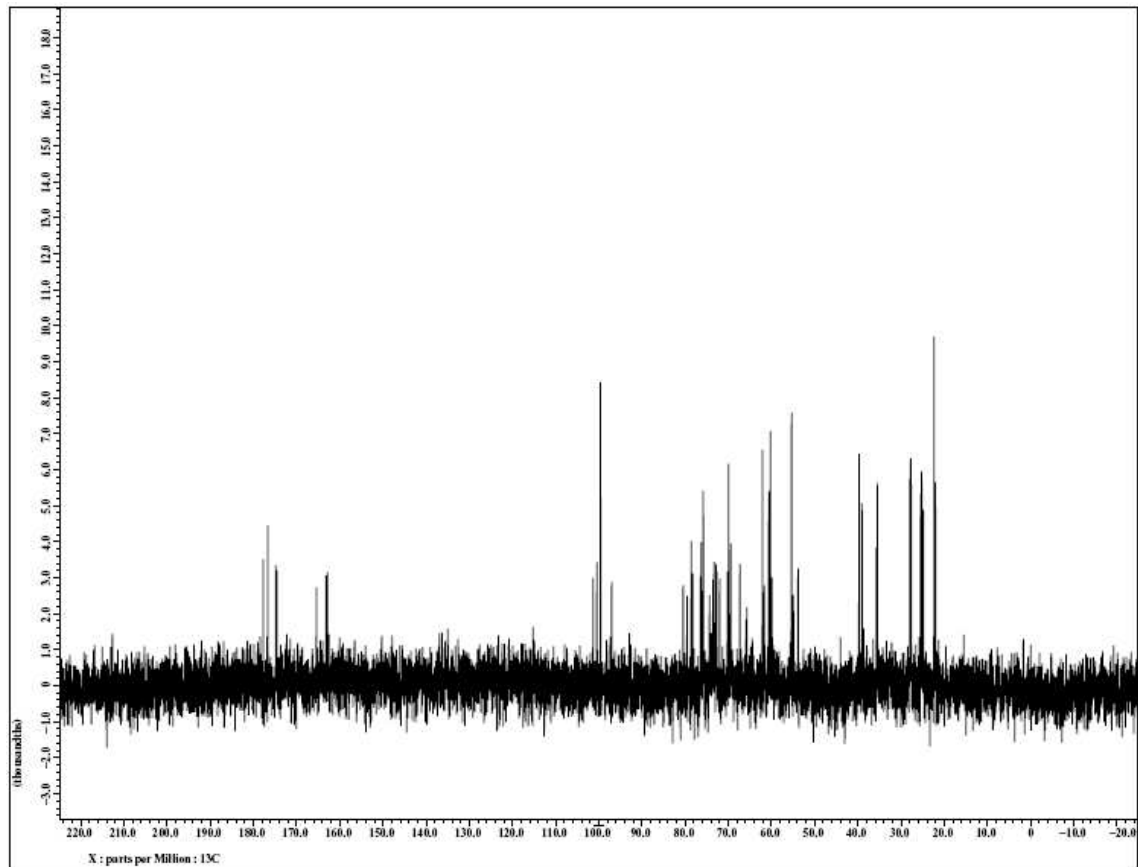

$^1\text{H}$ - $^{13}\text{C}$  HSQC NMR of GlcNAc<sub>2</sub>Man<sub>3</sub>GlcNAc<sub>2</sub>-LC-biotin (7)

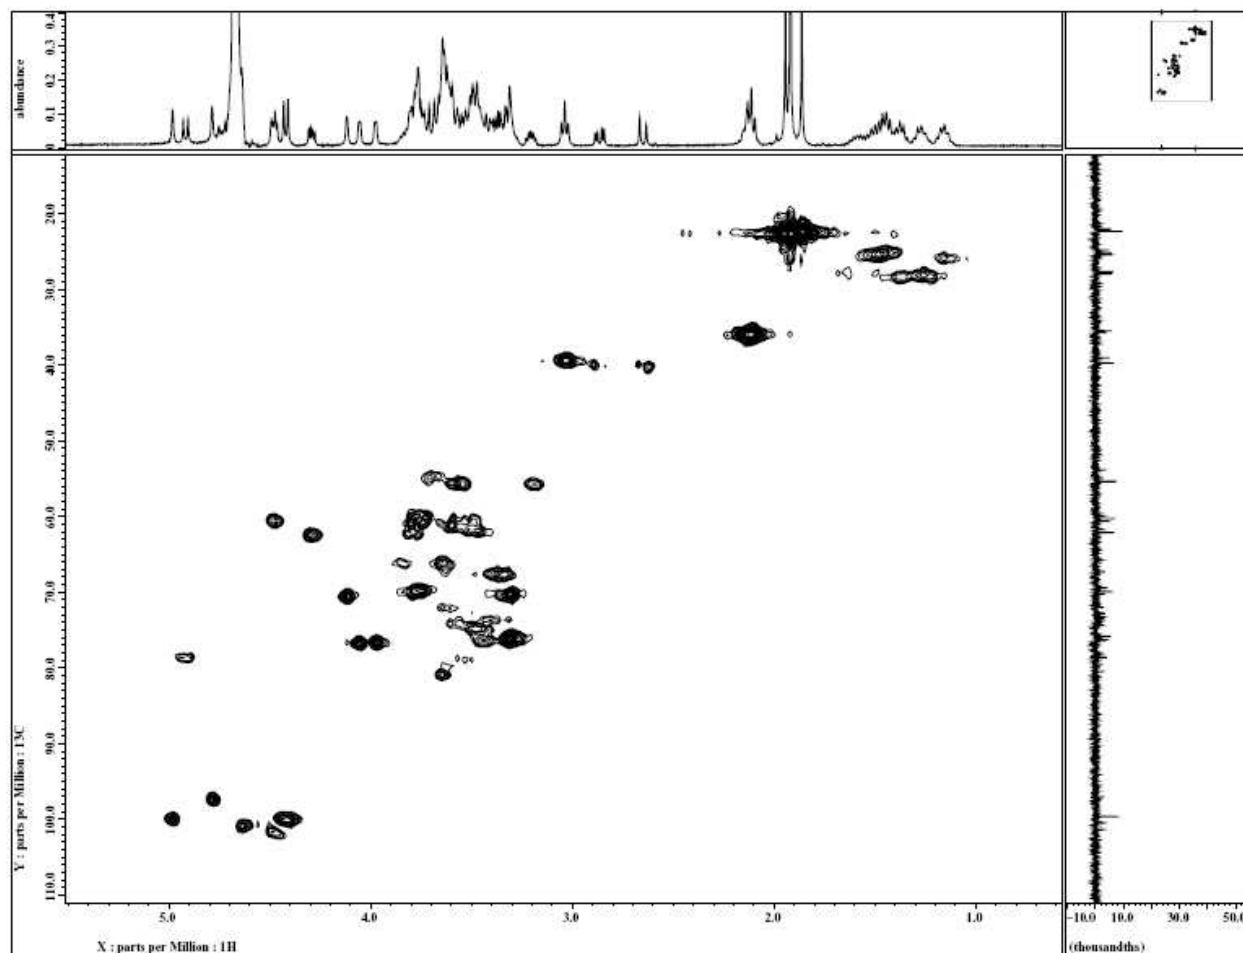



**$^1\text{H}$ - $^1\text{H}$  COSY NMR of GlcNAc<sub>2</sub>Man<sub>3</sub>GlcNAc<sub>2</sub>-LC-biotin (7)**

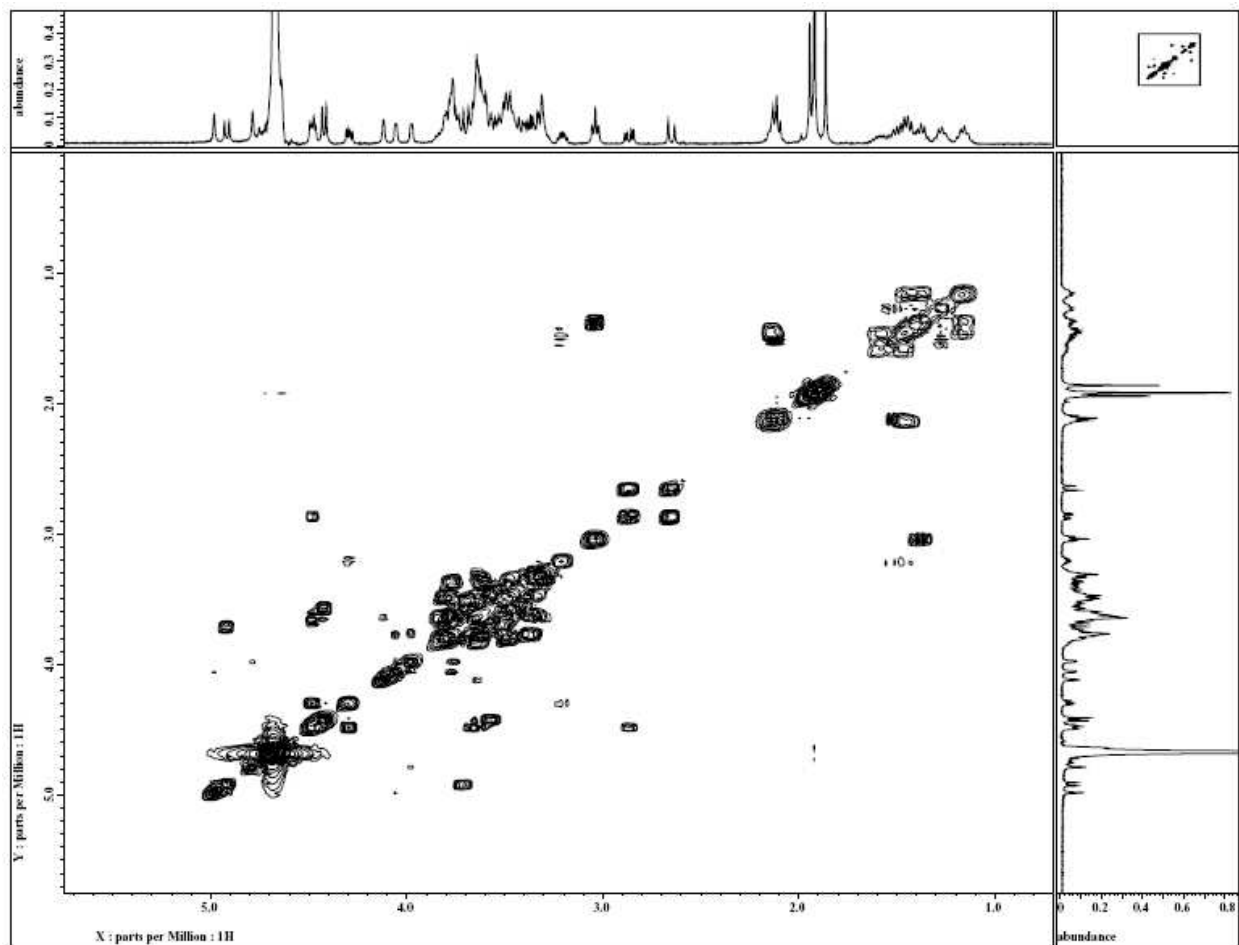

### MALDI-TOF MS spectrum of CT-GlcNAc<sub>2</sub>-LC-biotin (6)

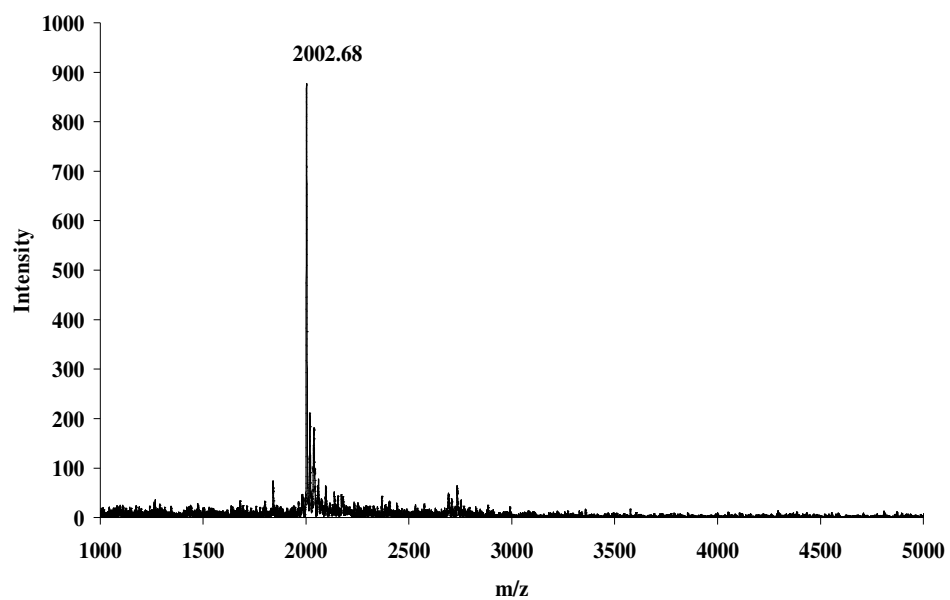

**MALDI-TOF MS spectrum of GlcNAc<sub>2</sub>Man<sub>3</sub>GlcNAc<sub>2</sub>-LC-biotin (7)**

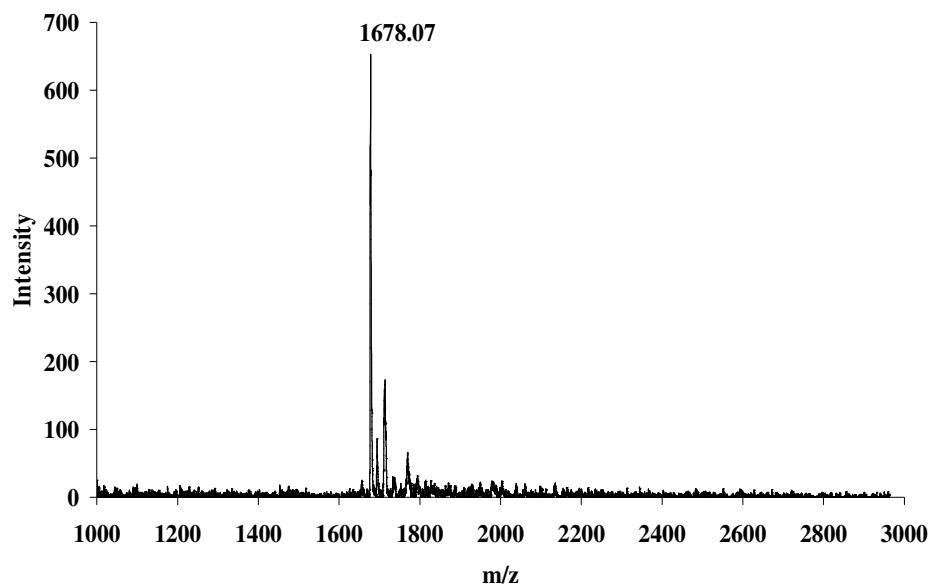

**MALDI-TOF MS spectrum of Man<sub>3</sub>GlcNAc<sub>2</sub>Man(1,6)-[Man<sub>3</sub>GlcNAc<sub>2</sub>Man(1,3)]-  
ManGlcNAc<sub>2</sub>-LC-biotin (9)**

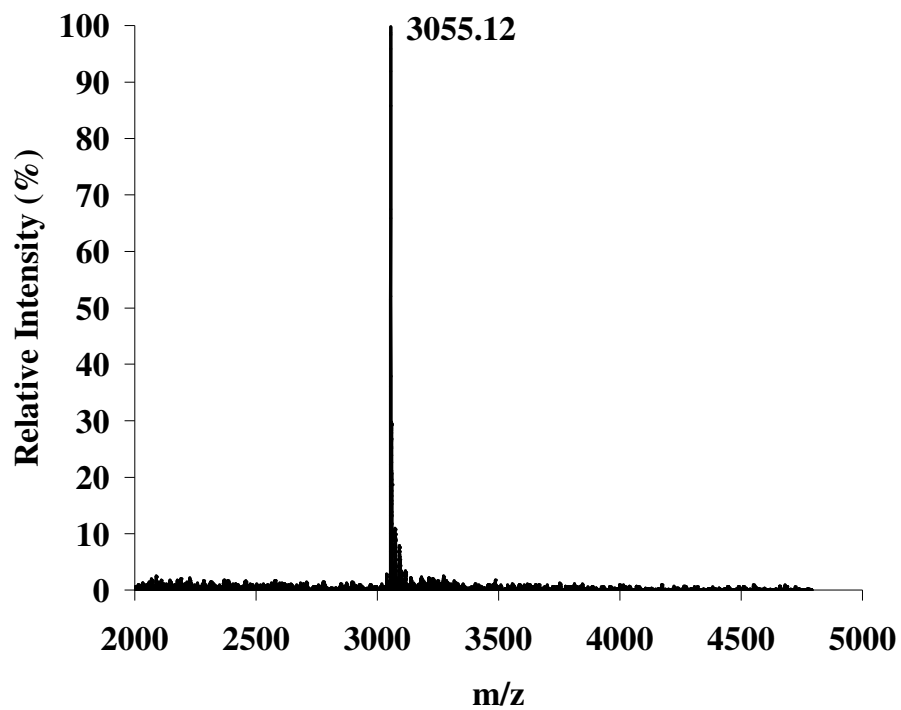

**MALDI-TOF MS spectrum of CT-GlcNAc<sub>2</sub>Man(1,6)-[GlcNAcMan(1,3)]-ManGlcNAc<sub>2</sub>-LC-biotin (10a)**

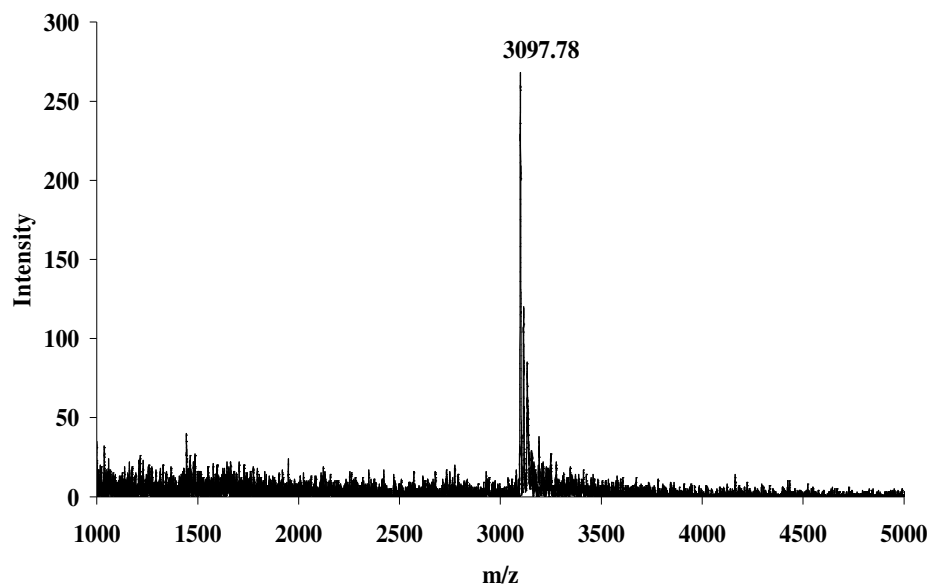

**MALDI-TOF MS spectrum of Man<sub>9</sub>GlcNAc<sub>2</sub>Man(1,6)-[GlcNAcMan(1,3)]-ManGlcNAc<sub>2</sub>-  
LC-biotin (12a)**

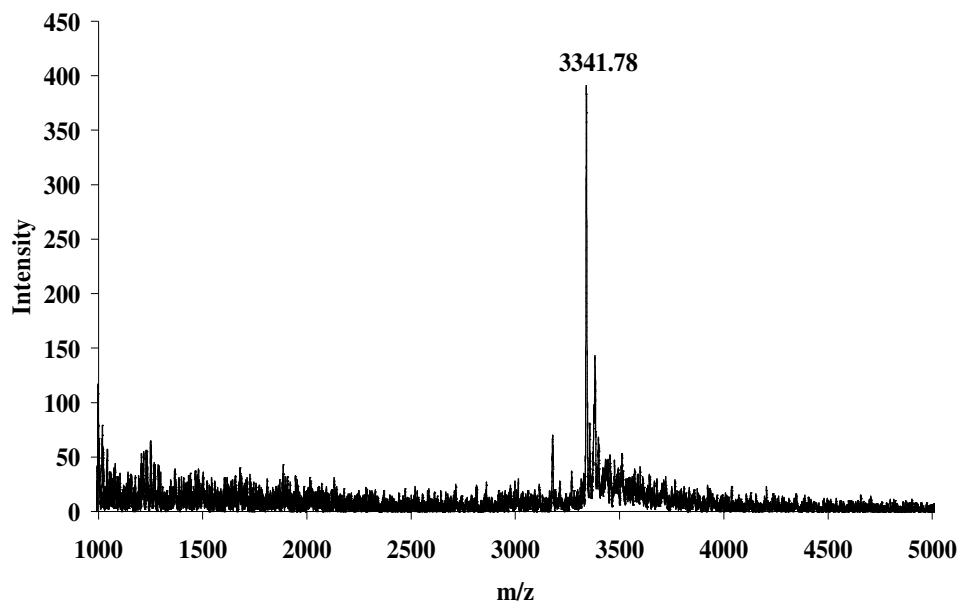

**MALDI-TOF MS spectrum of CT-GlcNAc<sub>2</sub>Man(1,6)-[CT-GlcNAc<sub>2</sub>Man(1,3)]-  
ManGlcNAc<sub>2</sub>-LC-biotin (10c)**

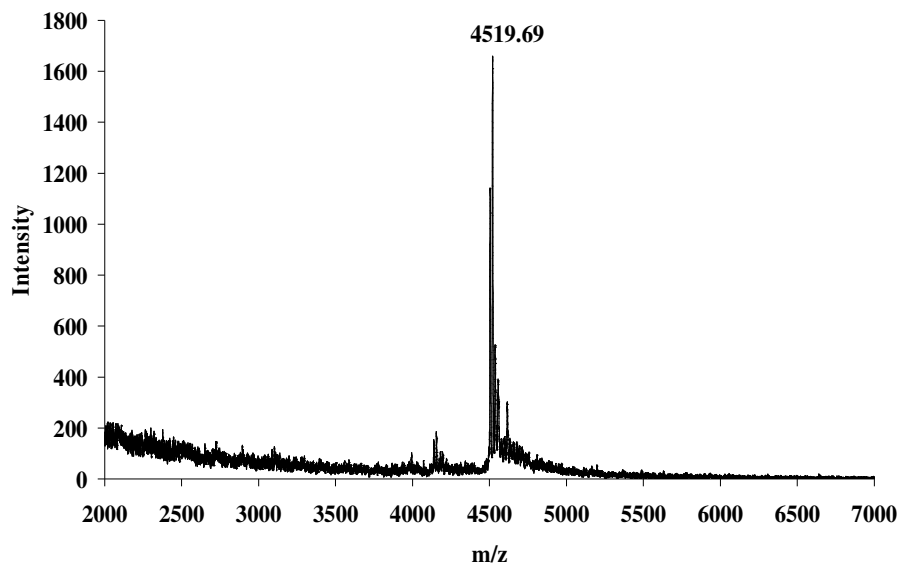

**MALDI-TOF MS spectrum of CT-GlcNAc<sub>2</sub>Man(1,6)-[Man<sub>3</sub>GlcNAc<sub>2</sub>Man(1,3)]-  
ManGlcNAc<sub>2</sub>-LC-biotin (13)**

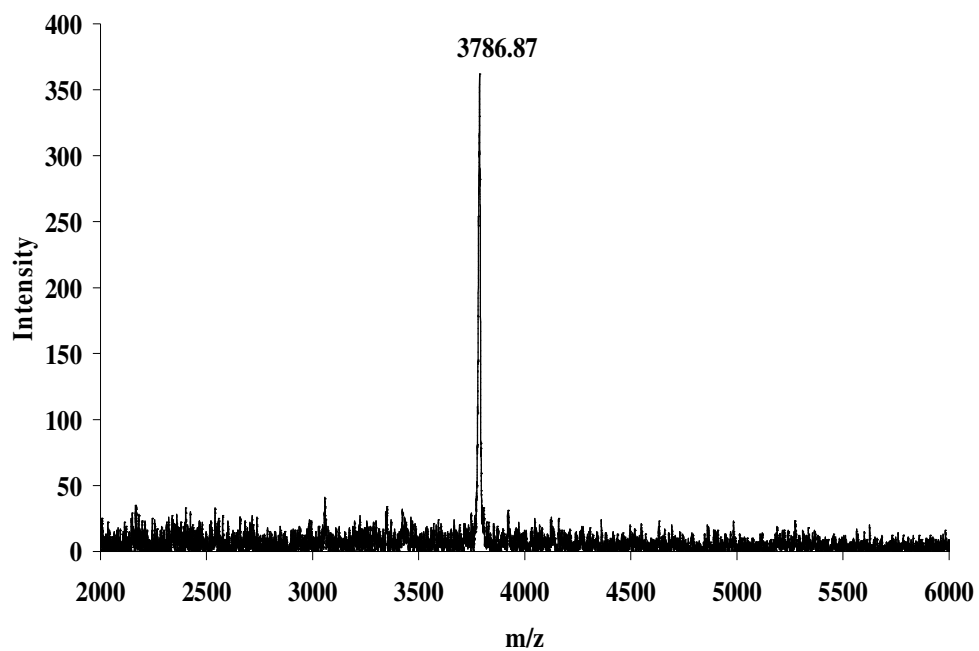



**MALDI-TOF MS spectrum of GlcNAc<sub>2</sub>Man<sub>3</sub>GlcNAc<sub>2</sub>Man(1,6)-  
[GlcNAc<sub>2</sub>Man<sub>3</sub>GlcNAc<sub>2</sub>Man(1,3)]-ManGlcNAc<sub>2</sub>-LC-biotin (14)**

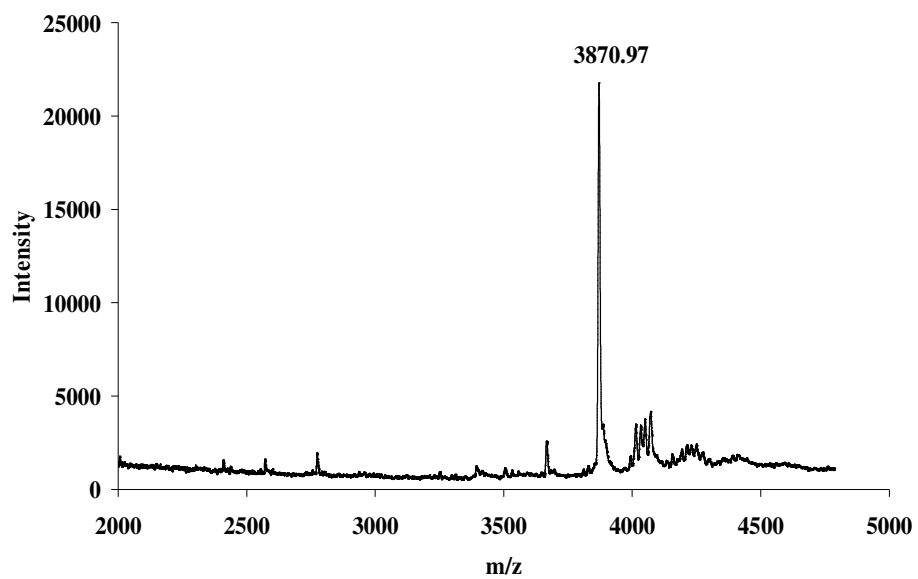

HPLC profiles of (a) glycan **6**; (b) glycan **7**; (c) glycan **9**; (d) glycan **10c**; (e) glycan **13**; (f) glycan **14**.

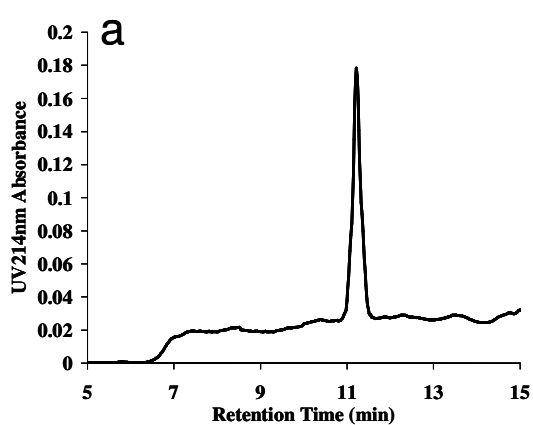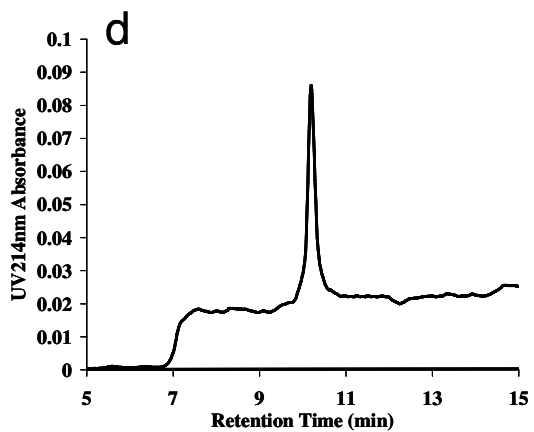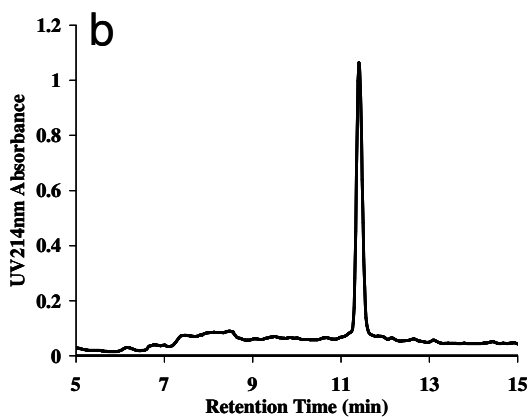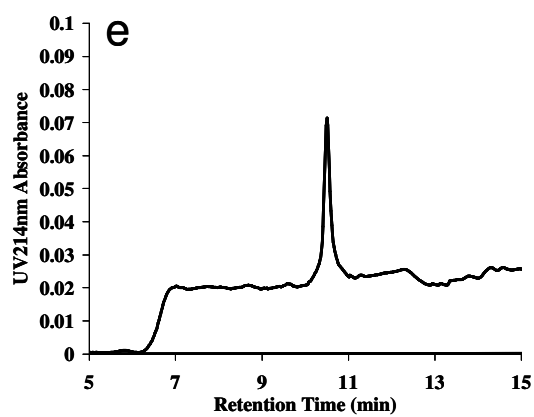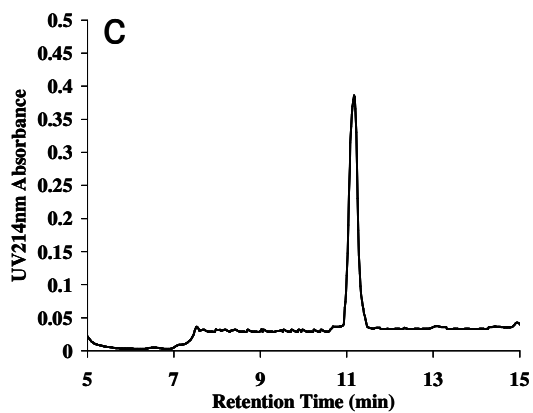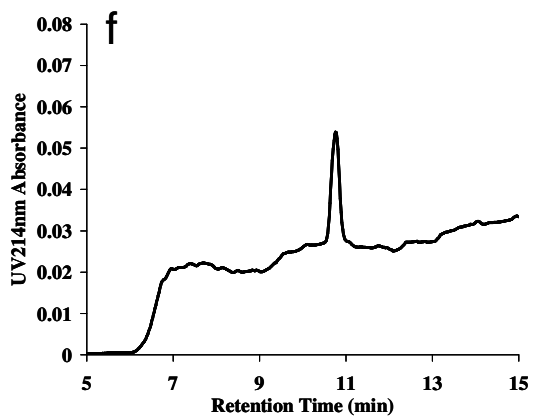

Supplement: NIHMS159722-supplement-1_si_001.pdf [file NIHMS159722-supplement-1_si_001.pdf]
